# Supplementary material
Source: PubMed Central journal article supplement (PMC6690143)

**A**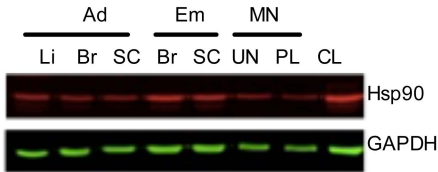**B**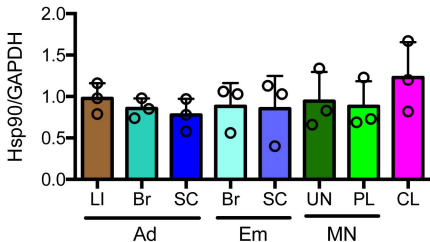

Supplement: Supplemental_Material.pdf [file Supplemental_Material.pdf]
